# Supplementary material for: Pollen and spores as biological recorders of past ultraviolet irradiance
Source: PubMed Central journal article supplement (PMC5157028; doi:10.1038/srep39269), 2016-12-15
Supplement: srep39269-s1.pdf [file srep39269-s1.pdf]

## Supplementary Information for:

### Pollen and spores as biological recorders of past ultraviolet irradiance

Phillip E. Jardine, Wesley T. Fraser, Barry H. Lomax, Mark A. Sephton, Timothy M. Shanahan, Charlotte S. Miller, and William D. Gosling

### Supplementary References

44. Ryan, W.B.F. *et al.* Global Multi-Resolution Topography synthesis, *Geochem. Geophys. Geosyst.* **10**, Q03014, doi: 10.1029/2008GC002332 (2009).

### Supplementary Tables

#### Supplementary Table S1. Sample information for modern *Lycopodium* data.

| Location      | Latitude | Longitude | Species                | Sampling  | TSI (W/m <sup>2</sup> ) | <i>n</i> | UAC mean | UAC s.d. |
|---------------|----------|-----------|------------------------|-----------|-------------------------|----------|----------|----------|
| Norway        | 68       | 18        | <i>L. annotinum</i>    | Field     | 199.22                  | 3        | 0.993    | 0.009    |
| West.Sweden   | 68       | 18        | <i>L. annotinum</i>    | Field     | 199.22                  | 7        | 0.945    | 0.051    |
| ANS.Sweden    | 68       | 19        | <i>L. annotinum</i>    | Field     | 199.22                  | 64       | 0.805    | 0.095    |
| Greenland.1   | 67       | 48        | <i>L. annotinum</i>    | Herbarium | 202.56                  | 5        | 0.776    | 0.101    |
| Greenland.2   | 66       | 52        | <i>L. annotinum</i>    | Herbarium | 206.31                  | 7        | 0.799    | 0.057    |
| Greenland.3   | 61       | 48        | <i>L. annotinum</i>    | Herbarium | 228.55                  | 9        | 0.825    | 0.096    |
| Greenland.4   | 60       | 45        | <i>L. annotinum</i>    | Herbarium | 233.32                  | 6        | 0.836    | 0.102    |
| India         | 20       | 81        | <i>L. annotinum</i>    | Herbarium | 392.67                  | 6        | 1.014    | 0.086    |
| Malaysia      | 4        | 102       | <i>L. annotinum</i>    | Herbarium | 415.81                  | 7        | 0.939    | 0.136    |
| Ecuador       | -1       | -78       | <i>L. magellanicum</i> | Herbarium | 417.07                  | 22       | 1.059    | 0.162    |
| SE.Asia       | -6       | 100       | <i>L. cernua</i>       | Field     | 415.43                  | 5        | 1.323    | 0.199    |
| South.Georgia | -54      | -37       | <i>L. magellanicum</i> | Field     | 269.62                  | 6        | 0.657    | 0.079    |

TSI is the modelled mean annual total solar irradiance<sup>32</sup>, *n* is the number of samples from each locality, UAC mean is the mean aromatic/OH ratio, and UAC s.d. is the standard deviation. See Supplementary Table S2 for the sample UAC values.

**Supplementary Table S2. UAC data for modern *Lycopodium* data.**

| Sample        | Location    | UACs   |
|---------------|-------------|--------|
| Norway.1      | Norway      | 1.0036 |
| Norway.2      | Norway      | 0.9854 |
| Norway.3      | Norway      | 0.9906 |
| West.Sweden.1 | West.Sweden | 1.0246 |
| West.Sweden.2 | West.Sweden | 0.8822 |
| West.Sweden.3 | West.Sweden | 0.9496 |
| West.Sweden.4 | West.Sweden | 0.9153 |
| West.Sweden.5 | West.Sweden | 0.9709 |
| West.Sweden.6 | West.Sweden | 0.9792 |
| West.Sweden.7 | West.Sweden | 0.8949 |
| ANS.Sweden.1  | ANS.Sweden  | 0.8259 |
| ANS.Sweden.2  | ANS.Sweden  | 1.0599 |
| ANS.Sweden.3  | ANS.Sweden  | 0.7979 |
| ANS.Sweden.4  | ANS.Sweden  | 0.8539 |
| ANS.Sweden.5  | ANS.Sweden  | 0.7012 |
| ANS.Sweden.6  | ANS.Sweden  | 0.7883 |
| ANS.Sweden.7  | ANS.Sweden  | 0.8014 |
| ANS.Sweden.8  | ANS.Sweden  | 0.8549 |
| ANS.Sweden.9  | ANS.Sweden  | 0.8443 |
| ANS.Sweden.10 | ANS.Sweden  | 0.7717 |
| ANS.Sweden.11 | ANS.Sweden  | 0.6952 |
| ANS.Sweden.12 | ANS.Sweden  | 0.69   |
| ANS.Sweden.13 | ANS.Sweden  | 0.7528 |
| ANS.Sweden.14 | ANS.Sweden  | 0.8187 |
| ANS.Sweden.15 | ANS.Sweden  | 0.7959 |
| ANS.Sweden.16 | ANS.Sweden  | 0.8471 |
| ANS.Sweden.17 | ANS.Sweden  | 0.8567 |
| ANS.Sweden.18 | ANS.Sweden  | 0.5905 |
| ANS.Sweden.19 | ANS.Sweden  | 0.6744 |
| ANS.Sweden.20 | ANS.Sweden  | 0.7667 |
| ANS.Sweden.21 | ANS.Sweden  | 0.7647 |
| ANS.Sweden.22 | ANS.Sweden  | 0.8198 |
| ANS.Sweden.23 | ANS.Sweden  | 0.8296 |
| ANS.Sweden.24 | ANS.Sweden  | 0.9329 |
| ANS.Sweden.25 | ANS.Sweden  | 0.9205 |
| ANS.Sweden.26 | ANS.Sweden  | 0.9548 |
| ANS.Sweden.27 | ANS.Sweden  | 0.8706 |
| ANS.Sweden.28 | ANS.Sweden  | 0.8936 |
| ANS.Sweden.29 | ANS.Sweden  | 0.9121 |
| ANS.Sweden.30 | ANS.Sweden  | 0.9086 |
| ANS.Sweden.31 | ANS.Sweden  | 0.9768 |
| ANS.Sweden.32 | ANS.Sweden  | 0.7849 |
| ANS.Sweden.33 | ANS.Sweden  | 0.9618 |
| ANS.Sweden.34 | ANS.Sweden  | 0.9684 |
| ANS.Sweden.35 | ANS.Sweden  | 0.9025 |
| ANS.Sweden.36 | ANS.Sweden  | 0.7746 |
| ANS.Sweden.37 | ANS.Sweden  | 0.7361 |
| ANS.Sweden.38 | ANS.Sweden  | 0.6783 |
| ANS.Sweden.39 | ANS.Sweden  | 0.669  |
| ANS.Sweden.40 | ANS.Sweden  | 0.6929 |
| ANS.Sweden.41 | ANS.Sweden  | 0.8237 |
| ANS.Sweden.42 | ANS.Sweden  | 0.6857 |
| ANS.Sweden.43 | ANS.Sweden  | 0.6077 |
| ANS.Sweden.44 | ANS.Sweden  | 0.7761 |
| ANS.Sweden.45 | ANS.Sweden  | 0.7998 |
| ANS.Sweden.46 | ANS.Sweden  | 0.7286 |
| ANS.Sweden.47 | ANS.Sweden  | 0.8333 |
| ANS.Sweden.48 | ANS.Sweden  | 0.7419 |
| ANS.Sweden.49 | ANS.Sweden  | 0.8497 |
| ANS.Sweden.50 | ANS.Sweden  | 0.6635 |

|               |             |        |
|---------------|-------------|--------|
| ANS.Sweden.51 | ANS.Sweden  | 0.7639 |
| ANS.Sweden.52 | ANS.Sweden  | 0.7208 |
| ANS.Sweden.53 | ANS.Sweden  | 0.6695 |
| ANS.Sweden.54 | ANS.Sweden  | 0.7689 |
| ANS.Sweden.55 | ANS.Sweden  | 0.8414 |
| ANS.Sweden.56 | ANS.Sweden  | 0.8206 |
| ANS.Sweden.57 | ANS.Sweden  | 0.9701 |
| ANS.Sweden.58 | ANS.Sweden  | 0.8988 |
| ANS.Sweden.59 | ANS.Sweden  | 0.8232 |
| ANS.Sweden.60 | ANS.Sweden  | 0.7506 |
| ANS.Sweden.61 | ANS.Sweden  | 0.8277 |
| ANS.Sweden.62 | ANS.Sweden  | 0.8331 |
| ANS.Sweden.63 | ANS.Sweden  | 0.7704 |
| ANS.Sweden.64 | ANS.Sweden  | 0.8111 |
| Greenland.1.1 | Greenland.1 | 0.75   |
| Greenland.1.2 | Greenland.1 | 0.6274 |
| Greenland.1.3 | Greenland.1 | 0.9057 |
| Greenland.1.4 | Greenland.1 | 0.7963 |
| Greenland.1.5 | Greenland.1 | 0.7988 |
| Greenland.2.1 | Greenland.2 | 0.7899 |
| Greenland.2.2 | Greenland.2 | 0.8472 |
| Greenland.2.3 | Greenland.2 | 0.7879 |
| Greenland.2.4 | Greenland.2 | 0.8262 |
| Greenland.2.5 | Greenland.2 | 0.6863 |
| Greenland.2.6 | Greenland.2 | 0.7962 |
| Greenland.2.7 | Greenland.2 | 0.8562 |
| Greenland.3.1 | Greenland.3 | 0.9975 |
| Greenland.3.2 | Greenland.3 | 0.7636 |
| Greenland.3.3 | Greenland.3 | 0.8274 |
| Greenland.3.4 | Greenland.3 | 0.739  |
| Greenland.3.5 | Greenland.3 | 0.7242 |
| Greenland.3.6 | Greenland.3 | 0.7192 |
| Greenland.3.7 | Greenland.3 | 0.8938 |
| Greenland.3.8 | Greenland.3 | 0.8903 |
| Greenland.3.9 | Greenland.3 | 0.867  |
| Greenland.4.1 | Greenland.4 | 0.8866 |
| Greenland.4.2 | Greenland.4 | 0.8844 |
| Greenland.4.3 | Greenland.4 | 0.8907 |
| Greenland.4.4 | Greenland.4 | 0.9126 |
| Greenland.4.5 | Greenland.4 | 0.6455 |
| Greenland.4.6 | Greenland.4 | 0.7952 |
| India.1       | India       | 1.025  |
| India.2       | India       | 1.0429 |
| India.3       | India       | 1.0131 |
| India.4       | India       | 0.8661 |
| India.5       | India       | 1.0055 |
| India.6       | India       | 1.1322 |
| Malaysia.1    | Malaysia    | 0.8689 |
| Malaysia.2    | Malaysia    | 1.1747 |
| Malaysia.3    | Malaysia    | 0.8429 |
| Malaysia.4    | Malaysia    | 1.0813 |
| Malaysia.5    | Malaysia    | 0.9375 |
| Malaysia.6    | Malaysia    | 0.8256 |
| Malaysia.7    | Malaysia    | 0.8449 |
| Ecuador.1     | Ecuador     | 1.0107 |
| Ecuador.2     | Ecuador     | 1.1037 |
| Ecuador.3     | Ecuador     | 1.0511 |
| Ecuador.4     | Ecuador     | 0.836  |
| Ecuador.5     | Ecuador     | 0.9486 |
| Ecuador.6     | Ecuador     | 1.3016 |
| Ecuador.7     | Ecuador     | 1.2821 |
| Ecuador.8     | Ecuador     | 1.0791 |
| Ecuador.9     | Ecuador     | 0.9376 |
| Ecuador.10    | Ecuador     | 0.869  |

|                 |               |        |
|-----------------|---------------|--------|
| Ecuador.11      | Ecuador       | 0.9961 |
| Ecuador.12      | Ecuador       | 1.221  |
| Ecuador.13      | Ecuador       | 1.1416 |
| Ecuador.14      | Ecuador       | 0.9466 |
| Ecuador.15      | Ecuador       | 1.1378 |
| Ecuador.16      | Ecuador       | 1.0826 |
| Ecuador.17      | Ecuador       | 0.8007 |
| Ecuador.18      | Ecuador       | 0.8162 |
| Ecuador.19      | Ecuador       | 0.9417 |
| Ecuador.20      | Ecuador       | 1.255  |
| Ecuador.21      | Ecuador       | 1.2883 |
| Ecuador.22      | Ecuador       | 1.2556 |
| SE.Asia.1       | SE.Asia       | 1.2015 |
| SE.Asia.2       | SE.Asia       | 1.31   |
| SE.Asia.3       | SE.Asia       | 1.6421 |
| SE.Asia.4       | SE.Asia       | 1.3404 |
| SE.Asia.5       | SE.Asia       | 1.1193 |
| South.Georgia.1 | South.Georgia | 0.5405 |
| South.Georgia.2 | South.Georgia | 0.7607 |
| South.Georgia.3 | South.Georgia | 0.6721 |
| South.Georgia.4 | South.Georgia | 0.6436 |
| South.Georgia.5 | South.Georgia | 0.7188 |
| South.Georgia.6 | South.Georgia | 0.6071 |

---

UACs are the aromatic/OH values for each sample, and are the mean of 5 replicate micro-FTIR measurements. Location UAC means and standard deviations are given in Supplementary Table S1.

**Supplementary Table S3. Sample information for fossil Poaceae data from Lake Bosumtwi.**

| Sample    | Depth (mbif) | Weighted mean age | Lower 95 age | Upper 95 age | Poaceae prop. | TSI (W/m <sup>2</sup> ) | UAC mean | UAC s.d. |
|-----------|--------------|-------------------|--------------|--------------|---------------|-------------------------|----------|----------|
| 2H_2_60   | 5.1          | 15002.26          | 14834.06     | 15350.43     | 0.46          | 418.36                  | -0.068   | 0.098    |
| 2H_2_70   | 5.2          | 15231.78          | 15071.56     | 15539.04     | 0.77          | 417.80                  | 0.142    | 0.089    |
| 2H_2_105  | 5.55         | 16034.96          | 15871.04     | 16210.78     | 0.51          | 416.36                  | 0.126    | 0.199    |
| 3H_1_10   | 6.1          | 17178.32          | 16964.93     | 17385.04     | 0.53          | 415.78                  | 0.127    | 0.162    |
| 3H_1_70   | 6.7          | 17849.32          | 17694.94     | 17988.37     | 0.58          | 416.28                  | 0.178    | 0.270    |
| 3H_2_10   | 7.6          | 18545.38          | 18382.17     | 18708.77     | 0.42          | 417.41                  | 0.057    | 0.110    |
| 3H_2_70   | 8.2          | 19399.64          | 19166.71     | 19627.18     | 0.49          | 419.59                  | -0.015   | 0.057    |
| 4H_1_0    | 9            | 21854.79          | 21634.06     | 22057.13     | 0.70          | 429.27                  | 0.217    | 0.145    |
| 4H_1_100  | 10           | 25135.76          | 24746.21     | 25399.45     | 0.61          | 442.83                  | 0.257    | 0.030    |
| 4H_2_51   | 11           | 26169.43          | 25979.13     | 26345.89     | 0.68          | 445.44                  | 0.275    | 0.091    |
| 5H_1_0    | 12           | 27949.07          | 27841.49     | 28043.42     | 0.66          | 447.16                  | 0.249    | 0.094    |
| 5H_1_100  | 13           | 28052.59          | 27946.16     | 28188.89     | 0.67          | 447.14                  | 0.199    | 0.033    |
| 5H_2_49   | 13.99        | 28843.86          | 28580.35     | 29061.83     | 0.39          | 446.58                  | -0.088   | 0.179    |
| 6H_1_0    | 15           | 29064.82          | 28777.65     | 29476.25     | 0.65          | 446.30                  | 0.044    | 0.059    |
| 6H_1_100  | 16           | 30236.13          | 29671.49     | 30996.29     | 0.61          | 444.07                  | 0.057    | 0.087    |
| 6H_1_130  | 16.3         | 32672.88          | 32200.45     | 33118.10     | 0.72          | 436.48                  | 0.141    | 0.117    |
| 6H_2_25   | 16.75        | 36330.12          | 35478.38     | 36919.44     | 0.39          | 424.83                  | 0.182    | 0.066    |
| 6H_2_85   | 17.35        | 38470.96          | 37318.56     | 39341.81     | 0.62          | 421.08                  | 0.253    | 0.008    |
| 6H_2_125  | 17.75        | 38596.80          | 37440.59     | 39610.39     | 0.71          | 420.96                  | 0.205    | 0.126    |
| 7H_1_10   | 18.1         | 38861.10          | 37826.12     | 39968.24     | 0.29          | 420.75                  | 0.145    | 0.070    |
| 7H_1_50   | 18.5         | 39614.53          | 38734.43     | 41040.53     | 0.77          | 420.38                  | -0.034   | 0.218    |
| 7H_1_110  | 19.1         | 40913.18          | 39532.15     | 43107.26     | 0.56          | 420.61                  | 0.052    | 0.144    |
| 7H_2_20   | 19.7         | 43060.79          | 40533.10     | 45408.81     | 0.16          | 423.21                  | 0.186    | 0.081    |
| 7H_2_40   | 19.9         | 43772.87          | 40745.23     | 46586.14     | 0.51          | 424.56                  | 0.057    | 0.093    |
| 7H_2_100  | 20.5         | 45258.43          | 42795.73     | 47748.06     | 0.53          | 428.01                  | 0.144    | 0.142    |
| 8H_1_0    | 21           | 46392.07          | 43803.72     | 48803.98     | 0.52          | 431.00                  | 0.183    | 0.124    |
| 8H_1_80   | 21.8         | 47911.70          | 46050.17     | 50257.51     | 0.67          | 435.28                  | 0.025    | 0.198    |
| 8H_1_120  | 22.2         | 48675.27          | 46593.53     | 51328.03     | 0.52          | 437.38                  | 0.005    | 0.050    |
| 8H_2_30   | 22.8         | 49813.30          | 47160.12     | 53195.59     | 0.59          | 440.34                  | 0.253    | 0.082    |
| 8H_2_49   | 22.99        | 50161.72          | 47265.42     | 53985.84     | 0.51          | 441.18                  | 0.296    | 0.272    |
| 8H_2_84.5 | 23.345       | 50833.87          | 47935.08     | 54557.52     | 0.33          | 442.68                  | 0.098    | 0.035    |
| 9H_1_0    | 24           | 52090.09          | 48541.51     | 56249.86     | 0.66          | 444.82                  | 0.222    | 0.234    |
| 9H_1_40   | 24.4         | 52847.09          | 49450.30     | 56828.26     | 0.36          | 445.66                  | 0.415    | 0.207    |
| 9H_1_80   | 24.8         | 53612.69          | 49971.47     | 57636.68     | 0.72          | 446.11                  | 0.133    | 0.168    |
| 9H_1_120  | 25.2         | 54360.52          | 50660.60     | 58390.89     | 0.36          | 446.07                  | 0.060    | 0.042    |
| 9H_2_30   | 25.8         | 55457.98          | 51577.73     | 59428.86     | 0.39          | 445.12                  | 0.074    | 0.099    |
| 9H_2_70   | 26.2         | 56179.04          | 52332.06     | 60198.60     | 0.64          | 443.95                  | 0.096    | 0.094    |
| 12H_2_55  | 35.05        | 78454.79          | 73205.68     | 83768.98     | 0.62          | 455.44                  | 0.182    | 0.048    |
| 13H_1_5   | 36.05        | 80136.98          | 74765.08     | 85463.98     | 0.79          | 449.54                  | 0.239    | 0.056    |
| 13H_1_105 | 37.05        | 81824.64          | 76513.66     | 87222.16     | 0.86          | 439.55                  | 0.290    | 0.038    |
| 13H_2_54  | 38.05        | 83489.25          | 78199.97     | 88777.68     | 0.80          | 427.82                  | 0.358    | 0.028    |
| 14H_1_5   | 39.05        | 85127.41          | 79861.96     | 90453.75     | 0.89          | 416.65                  | 0.174    | 0.065    |
| 14H_1_85  | 39.85        | 86323.34          | 81240.10     | 91576.02     | 0.91          | 410.17                  | 0.127    | 0.038    |
| 14H_2_54  | 41.05        | 87922.12          | 82587.49     | 93312.02     | 0.96          | 404.92                  | 0.125    | 0.023    |
| 15H_1_5   | 42.05        | 89274.03          | 83840.71     | 94710.11     | 0.89          | 404.52                  | 0.111    | 0.034    |
| 15H_1_105 | 43.05        | 90588.90          | 85044.22     | 96051.42     | 0.93          | 407.75                  | 0.167    | 0.028    |
| 15H_2_55  | 44.05        | 91920.07          | 86361.43     | 97447.52     | 0.96          | 414.65                  | 0.214    | 0.067    |
| 16H_1_5   | 45.05        | 93241.66          | 87635.02     | 98719.79     | 0.91          | 424.29                  | 0.192    | 0.050    |
| 16H_1_125 | 46.25        | 94825.98          | 89359.61     | 100200.21    | 0.88          | 438.11                  | 0.106    | 0.080    |
| 16H_2_96  | 47.45        | 96420.00          | 90987.70     | 101714.97    | 0.88          | 451.96                  | 0.155    | 0.015    |
| 17H_1_85  | 48.84        | 98232.22          | 92924.90     | 103399.49    | 0.78          | 464.17                  | 0.110    | 0.136    |
| 17H_2_36  | 49.85        | 99579.55          | 94354.41     | 104559.45    | 0.80          | 468.54                  | 0.361    | 0.168    |
| 17H_2_136 | 50.85        | 100924.00         | 95856.16     | 105852.25    | 0.78          | 468.00                  | 0.272    | 0.154    |
| 18H_1_105 | 52.05        | 102545.36         | 97626.49     | 107435.56    | 0.86          | 460.42                  | 0.231    | 0.080    |
| 18H_2_35  | 52.85        | 103751.94         | 98777.71     | 108730.30    | 0.76          | 450.77                  | 0.188    | 0.018    |
| 18H_2_125 | 53.75        | 105260.80         | 100158.02    | 110375.23    | 0.88          | 435.60                  | 0.186    | 0.064    |
| 19H_1_85  | 54.85        | 107227.54         | 101808.66    | 112699.02    | 0.52          | 415.51                  | 0.151    | 0.063    |
| 19H_2_35  | 55.85        | 109082.80         | 103542.19    | 114694.86    | 0.91          | 401.57                  | 0.024    | 0.070    |
| 19H_2_115 | 56.65        | 110879.07         | 105190.38    | 116504.90    | 0.88          | 396.75                  | 0.206    | 0.056    |
| 20H_1_25  | 57.25        | 112355.11         | 106553.36    | 118091.17    | 0.77          | 400.37                  | 0.119    | 0.099    |

|           |       |           |           |           |      |        |       |       |
|-----------|-------|-----------|-----------|-----------|------|--------|-------|-------|
| 20H_1_85  | 57.85 | 114029.53 | 107836.40 | 119874.65 | 0.72 | 411.96 | 0.242 | 0.026 |
| 20H_2_36  | 58.85 | 116828.42 | 110801.73 | 122562.63 | 0.51 | 441.47 | 0.224 | 0.095 |
| 20H_2_76  | 59.25 | 117841.81 | 112037.19 | 123539.80 | 0.32 | 452.13 | 0.034 | 0.106 |
| 20H_2_116 | 59.65 | 118804.48 | 113218.67 | 124230.91 | 0.78 | 460.75 | 0.192 | 0.019 |
| 21H_1_65  | 60.65 | 120953.51 | 115875.35 | 126017.19 | 0.84 | 471.39 | 0.182 | 0.074 |
| 21H_1_145 | 61.45 | 122472.25 | 117441.91 | 127466.59 | 0.82 | 470.28 | 0.228 | 0.044 |
| 21H_2_76  | 62.25 | 123829.42 | 118460.77 | 129283.74 | 0.84 | 463.55 | 0.278 | 0.055 |
| 22H_1_0   | 63    | 125053.58 | 119274.54 | 131034.85 | 0.82 | 453.94 | 0.203 | 0.031 |
| 22H_1_60  | 63.6  | 125988.05 | 120241.26 | 132018.07 | 0.30 | 445.17 | 0.181 | 0.033 |

Weighted mean age, lower 95 age and upper 95 age are the reconstructed weighted mean and 95% credible interval ages from the BACON age depth model<sup>39</sup>. Poaceae proportion is the proportion of Poaceae in the pollen sum<sup>29</sup>, TSI is the modelled total solar irradiance for 21<sup>st</sup> September<sup>32</sup>, UAC mean is the mean aromatic/OH ratio across three replicates, and UAC s.d. is the standard deviation. See Supplementary Table S4 for the UAC values from each replicate.

**Supplementary Table S4. UAC data for fossil Poaceae data from Lake Bosumtwi.**

| Replicate  | Sample   | UACs   |
|------------|----------|--------|
| 2H_2_60_1  | 2H_2_60  | 0.024  |
| 2H_2_60_2  | 2H_2_60  | -0.171 |
| 2H_2_60_3  | 2H_2_60  | -0.056 |
| 2H_2_70_1  | 2H_2_70  | 0.064  |
| 2H_2_70_2  | 2H_2_70  | 0.123  |
| 2H_2_70_3  | 2H_2_70  | 0.239  |
| 2H_2_105_1 | 2H_2_105 | -0.103 |
| 2H_2_105_2 | 2H_2_105 | 0.257  |
| 2H_2_105_3 | 2H_2_105 | 0.224  |
| 3H_1_10_1  | 3H_1_10  | -0.031 |
| 3H_1_10_2  | 3H_1_10  | 0.122  |
| 3H_1_10_3  | 3H_1_10  | 0.292  |
| 3H_1_70_1  | 3H_1_70  | -0.130 |
| 3H_1_70_2  | 3H_1_70  | 0.289  |
| 3H_1_70_3  | 3H_1_70  | 0.375  |
| 3H_2_10_1  | 3H_2_10  | -0.026 |
| 3H_2_10_2  | 3H_2_10  | 0.182  |
| 3H_2_10_3  | 3H_2_10  | 0.014  |
| 3H_2_70_1  | 3H_2_70  | 0.033  |
| 3H_2_70_2  | 3H_2_70  | 0.000  |
| 3H_2_70_3  | 3H_2_70  | -0.078 |
| 4H_1_0_1   | 4H_1_0   | 0.329  |
| 4H_1_0_2   | 4H_1_0   | 0.269  |
| 4H_1_0_3   | 4H_1_0   | 0.054  |
| 4H_1_100_1 | 4H_1_100 | 0.240  |
| 4H_1_100_2 | 4H_1_100 | 0.240  |
| 4H_1_100_3 | 4H_1_100 | 0.292  |
| 4H_2_51_1  | 4H_2_51  | 0.219  |
| 4H_2_51_2  | 4H_2_51  | 0.226  |
| 4H_2_51_3  | 4H_2_51  | 0.379  |
| 5H_1_0_1   | 5H_1_0   | 0.344  |
| 5H_1_0_2   | 5H_1_0   | 0.244  |
| 5H_1_0_3   | 5H_1_0   | 0.157  |
| 5H_1_100_1 | 5H_1_100 | 0.167  |
| 5H_1_100_2 | 5H_1_100 | 0.233  |
| 5H_1_100_3 | 5H_1_100 | 0.198  |
| 5H_2_49_1  | 5H_2_49  | 0.057  |
| 5H_2_49_2  | 5H_2_49  | -0.034 |
| 5H_2_49_3  | 5H_2_49  | -0.287 |
| 6H_1_0_1   | 6H_1_0   | 0.108  |
| 6H_1_0_2   | 6H_1_0   | -0.007 |
| 6H_1_0_3   | 6H_1_0   | 0.030  |
| 6H_1_100_1 | 6H_1_100 | -0.040 |
| 6H_1_100_2 | 6H_1_100 | 0.129  |
| 6H_1_100_3 | 6H_1_100 | 0.081  |
| 6H_1_130_1 | 6H_1_130 | 0.053  |
| 6H_1_130_2 | 6H_1_130 | 0.096  |
| 6H_1_130_3 | 6H_1_130 | 0.274  |
| 6H_2_25_1  | 6H_2_25  | 0.106  |
| 6H_2_25_2  | 6H_2_25  | 0.217  |
| 6H_2_25_3  | 6H_2_25  | 0.224  |
| 6H_2_85_1  | 6H_2_85  | 0.257  |
| 6H_2_85_2  | 6H_2_85  | 0.259  |
| 6H_2_85_3  | 6H_2_85  | 0.243  |
| 6H_2_125_1 | 6H_2_125 | 0.150  |
| 6H_2_125_2 | 6H_2_125 | 0.115  |
| 6H_2_125_3 | 6H_2_125 | 0.349  |
| 7H_1_10_1  | 7H_1_10  | 0.177  |
| 7H_1_10_2  | 7H_1_10  | 0.193  |
| 7H_1_10_3  | 7H_1_10  | 0.065  |

|             |           |        |
|-------------|-----------|--------|
| 7H_1_50_1   | 7H_1_50   | -0.081 |
| 7H_1_50_2   | 7H_1_50   | 0.203  |
| 7H_1_50_3   | 7H_1_50   | -0.225 |
| 7H_1_110_1  | 7H_1_110  | -0.099 |
| 7H_1_110_2  | 7H_1_110  | 0.188  |
| 7H_1_110_3  | 7H_1_110  | 0.068  |
| 7H_2_20_1   | 7H_2_20   | 0.098  |
| 7H_2_20_2   | 7H_2_20   | 0.256  |
| 7H_2_20_3   | 7H_2_20   | 0.204  |
| 7H_2_40_1   | 7H_2_40   | 0.102  |
| 7H_2_40_2   | 7H_2_40   | 0.119  |
| 7H_2_40_3   | 7H_2_40   | -0.050 |
| 7H_2_100_1  | 7H_2_100  | 0.226  |
| 7H_2_100_2  | 7H_2_100  | -0.020 |
| 7H_2_100_3  | 7H_2_100  | 0.227  |
| 8H_1_0_1    | 8H_1_0    | 0.046  |
| 8H_1_0_2    | 8H_1_0    | 0.215  |
| 8H_1_0_3    | 8H_1_0    | 0.288  |
| 8H_1_80_1   | 8H_1_80   | -0.075 |
| 8H_1_80_2   | 8H_1_80   | 0.253  |
| 8H_1_80_3   | 8H_1_80   | -0.103 |
| 8H_1_120_1  | 8H_1_120  | -0.051 |
| 8H_1_120_2  | 8H_1_120  | 0.020  |
| 8H_1_120_3  | 8H_1_120  | 0.046  |
| 8H_2_30_1   | 8H_2_30   | 0.283  |
| 8H_2_30_2   | 8H_2_30   | 0.316  |
| 8H_2_30_3   | 8H_2_30   | 0.161  |
| 8H_2_49_1   | 8H_2_49   | 0.135  |
| 8H_2_49_2   | 8H_2_49   | 0.143  |
| 8H_2_49_3   | 8H_2_49   | 0.610  |
| 8H_2_84.5_1 | 8H_2_84.5 | 0.073  |
| 8H_2_84.5_2 | 8H_2_84.5 | 0.138  |
| 8H_2_84.5_3 | 8H_2_84.5 | 0.084  |
| 9H_1_0_1    | 9H_1_0    | 0.047  |
| 9H_1_0_2    | 9H_1_0    | 0.132  |
| 9H_1_0_3    | 9H_1_0    | 0.488  |
| 9H_1_40_1   | 9H_1_40   | 0.180  |
| 9H_1_40_2   | 9H_1_40   | 0.500  |
| 9H_1_40_3   | 9H_1_40   | 0.567  |
| 9H_1_80_1   | 9H_1_80   | -0.038 |
| 9H_1_80_2   | 9H_1_80   | 0.139  |
| 9H_1_80_3   | 9H_1_80   | 0.299  |
| 9H_1_120_1  | 9H_1_120  | 0.063  |
| 9H_1_120_2  | 9H_1_120  | 0.101  |
| 9H_1_120_3  | 9H_1_120  | 0.017  |
| 9H_2_30_1   | 9H_2_30   | 0.034  |
| 9H_2_30_2   | 9H_2_30   | 0.186  |
| 9H_2_30_3   | 9H_2_30   | 0.000  |
| 9H_2_70_1   | 9H_2_70   | 0.200  |
| 9H_2_70_2   | 9H_2_70   | 0.016  |
| 9H_2_70_3   | 9H_2_70   | 0.073  |
| 12H_2_55_1  | 12H_2_55  | 0.185  |
| 12H_2_55_2  | 12H_2_55  | 0.229  |
| 12H_2_55_3  | 12H_2_55  | 0.133  |
| 13H_1_5_1   | 13H_1_5   | 0.275  |
| 13H_1_5_2   | 13H_1_5   | 0.174  |
| 13H_1_5_3   | 13H_1_5   | 0.268  |
| 13H_1_105_1 | 13H_1_105 | 0.329  |
| 13H_1_105_2 | 13H_1_105 | 0.253  |
| 13H_1_105_3 | 13H_1_105 | 0.288  |
| 13H_2_54_1  | 13H_2_54  | 0.390  |
| 13H_2_54_2  | 13H_2_54  | 0.342  |
| 13H_2_54_3  | 13H_2_54  | 0.341  |
| 14H_1_5_1   | 14H_1_5   | 0.127  |



|             |           |        |
|-------------|-----------|--------|
| 14H_1_5_2   | 14H_1_5   | 0.147  |
| 14H_1_5_3   | 14H_1_5   | 0.248  |
| 14H_1_85_1  | 14H_1_85  | 0.143  |
| 14H_1_85_2  | 14H_1_85  | 0.155  |
| 14H_1_85_3  | 14H_1_85  | 0.084  |
| 14H_2_54_1  | 14H_2_54  | 0.104  |
| 14H_2_54_2  | 14H_2_54  | 0.150  |
| 14H_2_54_3  | 14H_2_54  | 0.123  |
| 15H_1_5_1   | 15H_1_5   | 0.145  |
| 15H_1_5_2   | 15H_1_5   | 0.110  |
| 15H_1_5_3   | 15H_1_5   | 0.077  |
| 15H_1_105_1 | 15H_1_105 | 0.163  |
| 15H_1_105_2 | 15H_1_105 | 0.141  |
| 15H_1_105_3 | 15H_1_105 | 0.196  |
| 15H_2_55_1  | 15H_2_55  | 0.137  |
| 15H_2_55_2  | 15H_2_55  | 0.246  |
| 15H_2_55_3  | 15H_2_55  | 0.259  |
| 16H_1_5_1   | 16H_1_5   | 0.182  |
| 16H_1_5_2   | 16H_1_5   | 0.247  |
| 16H_1_5_3   | 16H_1_5   | 0.148  |
| 16H_1_125_1 | 16H_1_125 | 0.045  |
| 16H_1_125_2 | 16H_1_125 | 0.196  |
| 16H_1_125_3 | 16H_1_125 | 0.075  |
| 16H_2_96_1  | 16H_2_96  | 0.153  |
| 16H_2_96_2  | 16H_2_96  | 0.141  |
| 16H_2_96_3  | 16H_2_96  | 0.171  |
| 17H_1_85_1  | 17H_1_85  | 0.067  |
| 17H_1_85_2  | 17H_1_85  | 0.000  |
| 17H_1_85_3  | 17H_1_85  | 0.262  |
| 17H_2_36_1  | 17H_2_36  | 0.167  |
| 17H_2_36_2  | 17H_2_36  | 0.458  |
| 17H_2_36_3  | 17H_2_36  | 0.457  |
| 17H_2_136_1 | 17H_2_136 | 0.300  |
| 17H_2_136_2 | 17H_2_136 | 0.410  |
| 17H_2_136_3 | 17H_2_136 | 0.106  |
| 18H_1_105_1 | 18H_1_105 | 0.314  |
| 18H_1_105_2 | 18H_1_105 | 0.224  |
| 18H_1_105_3 | 18H_1_105 | 0.154  |
| 18H_2_35_1  | 18H_2_35  | 0.176  |
| 18H_2_35_2  | 18H_2_35  | 0.208  |
| 18H_2_35_3  | 18H_2_35  | 0.180  |
| 18H_2_125_1 | 18H_2_125 | 0.157  |
| 18H_2_125_2 | 18H_2_125 | 0.141  |
| 18H_2_125_3 | 18H_2_125 | 0.259  |
| 19H_1_85_1  | 19H_1_85  | 0.216  |
| 19H_1_85_2  | 19H_1_85  | 0.145  |
| 19H_1_85_3  | 19H_1_85  | 0.091  |
| 19H_2_35_1  | 19H_2_35  | 0.046  |
| 19H_2_35_2  | 19H_2_35  | 0.081  |
| 19H_2_35_3  | 19H_2_35  | -0.054 |
| 19H_2_115_1 | 19H_2_115 | 0.158  |
| 19H_2_115_2 | 19H_2_115 | 0.268  |
| 19H_2_115_3 | 19H_2_115 | 0.194  |
| 20H_1_25_1  | 20H_1_25  | 0.044  |
| 20H_1_25_2  | 20H_1_25  | 0.081  |
| 20H_1_25_3  | 20H_1_25  | 0.232  |
| 20H_1_85_1  | 20H_1_85  | 0.214  |
| 20H_1_85_2  | 20H_1_85  | 0.247  |
| 20H_1_85_3  | 20H_1_85  | 0.265  |
| 20H_2_36_1  | 20H_2_36  | 0.179  |
| 20H_2_36_2  | 20H_2_36  | 0.161  |
| 20H_2_36_3  | 20H_2_36  | 0.333  |
| 20H_2_76_1  | 20H_2_76  | -0.085 |
| 20H_2_76_2  | 20H_2_76  | 0.119  |

|             |           |       |
|-------------|-----------|-------|
| 20H_2_76_3  | 20H_2_76  | 0.070 |
| 20H_2_116_1 | 20H_2_116 | 0.201 |
| 20H_2_116_2 | 20H_2_116 | 0.171 |
| 20H_2_116_3 | 20H_2_116 | 0.205 |
| 21H_1_65_1  | 21H_1_65  | 0.216 |
| 21H_1_65_2  | 21H_1_65  | 0.098 |
| 21H_1_65_3  | 21H_1_65  | 0.233 |
| 21H_1_145_1 | 21H_1_145 | 0.185 |
| 21H_1_145_2 | 21H_1_145 | 0.227 |
| 21H_1_145_3 | 21H_1_145 | 0.273 |
| 21H_2_76_1  | 21H_2_76  | 0.339 |
| 21H_2_76_2  | 21H_2_76  | 0.264 |
| 21H_2_76_3  | 21H_2_76  | 0.232 |
| 22H_1_0_1   | 22H_1_0   | 0.236 |
| 22H_1_0_2   | 22H_1_0   | 0.199 |
| 22H_1_0_3   | 22H_1_0   | 0.174 |
| 22H_1_60_1  | 22H_1_60  | 0.185 |
| 22H_1_60_2  | 22H_1_60  | 0.146 |
| 22H_1_60_3  | 22H_1_60  | 0.211 |

---

UACs are the aromatic/OH values for each replicate. Sample UAC means and standard deviations are provided in Supplementary Table S3.

## Supplementary Figures

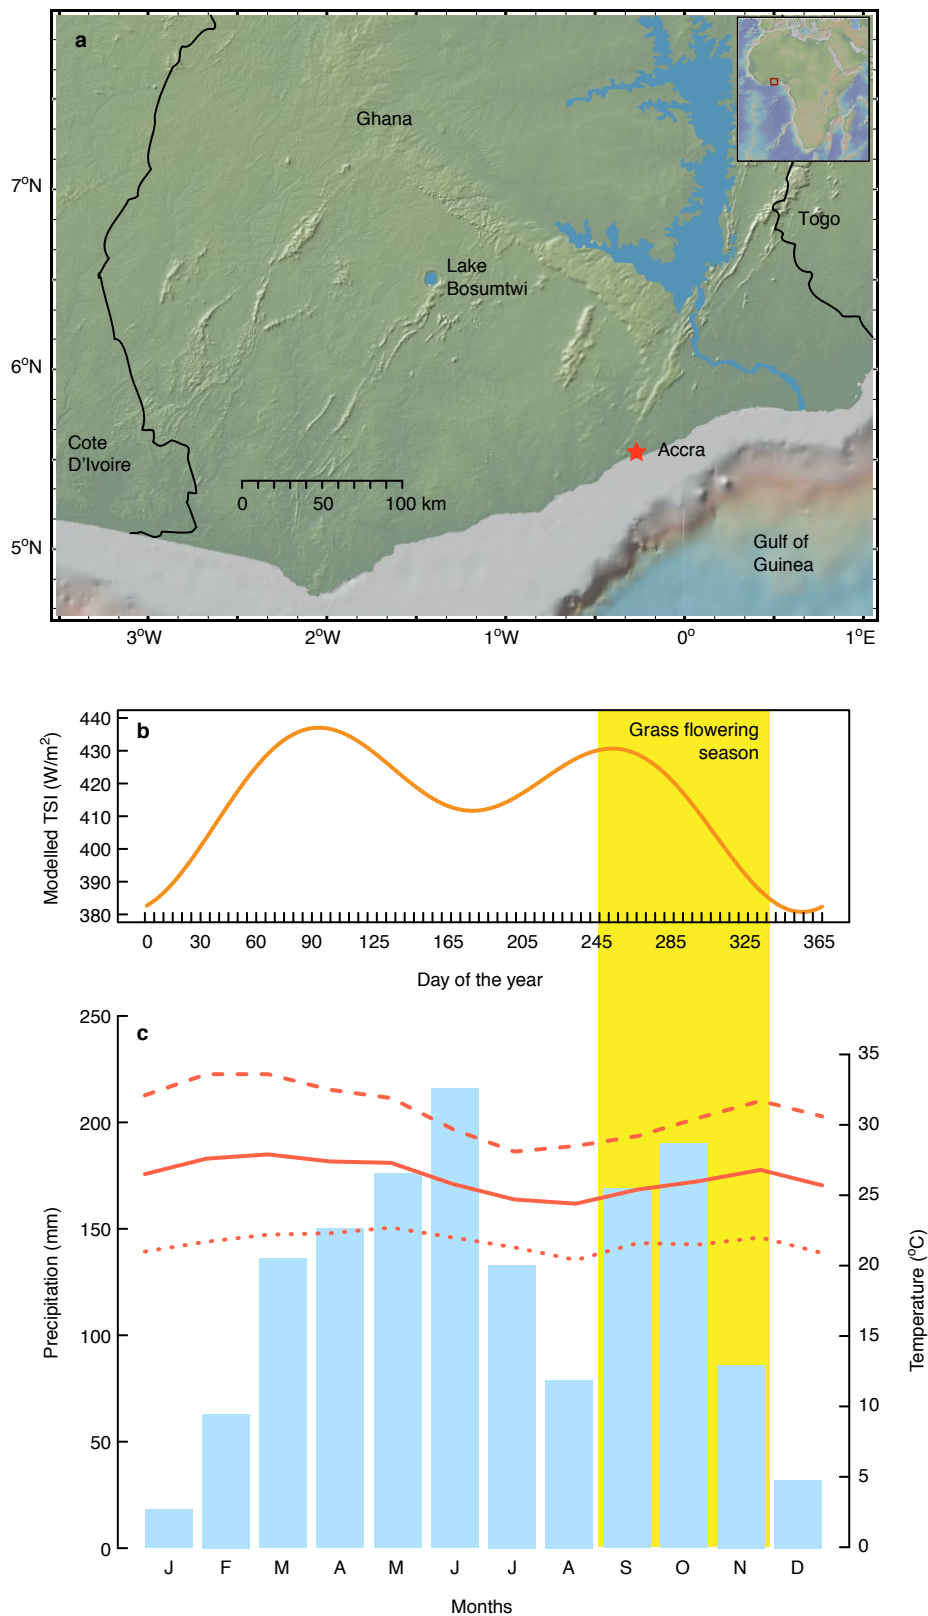

**Supplementary Figure S1. Lake Bosumtwi location and modern Ghanaian solar irradiance and climate. a,** Location map showing the position of Lake Bosumtwi. Basemap created using

GeoMapApp v. 3.6.3, <http://www.geomapapp.org>, using the Global Multi-Resolution Topography (GMRT) data compilation<sup>44</sup>. **b**, Modelled solar irradiance at 6°N<sup>32</sup>. **c**, Monthly precipitation (blue bars) and minimum, mean and maximum temperature (dotted, solid and dashed red lines, respectively) for the city of Kumasi, ~30 km NW of Lake Bosumtwi (climate data from <http://en.climate-data.org/>). Yellow box shows Ghanaian grass flowering season<sup>30</sup>.

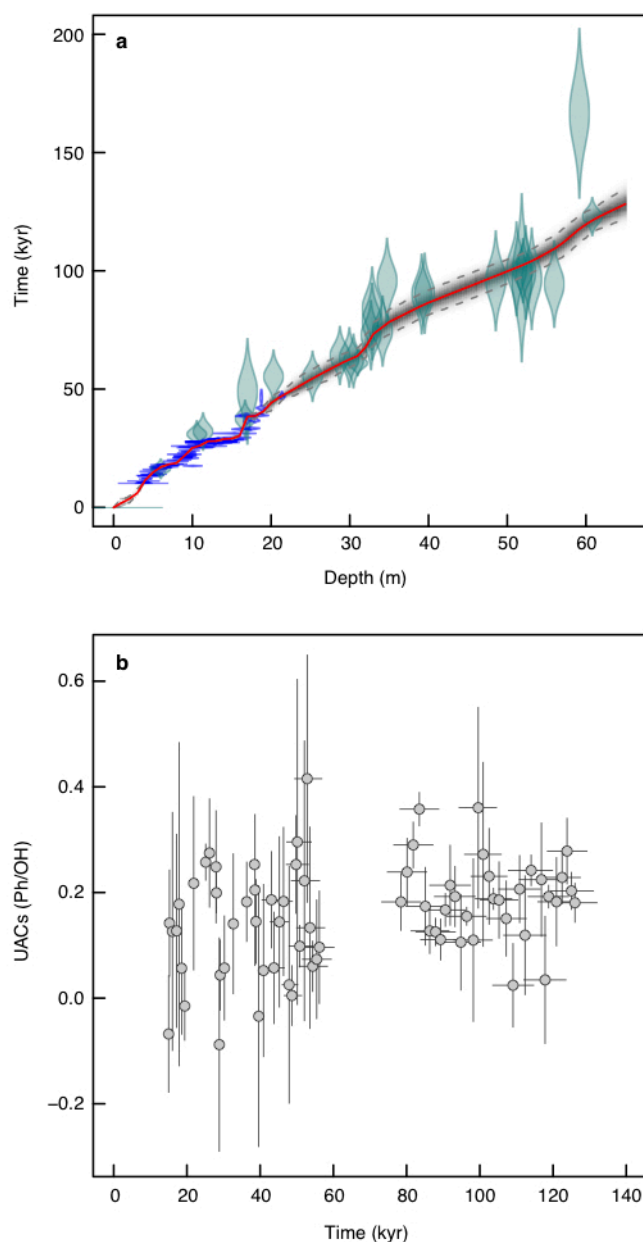

**Supplementary Figure S2. Age-depth model for Lake Bosumtwi.** **a**, Bayesian-calibrated age-depth model for the Lake Bosumtwi sediment sequence, calculated using the Bacon software package<sup>39</sup>. Blue symbols are the age estimates with associated uncertainties, solid red line is the median Markov Chain Monte Carlo (MCMC)-derived age-depth model, and the dotted black lines are the 95% confidence intervals. **b**, Age-depth model uncertainty in sample age estimation. UAC concentrations in Poaceae pollen from Lake Bosumtwi. Solid circles are the sample mean phenolic concentrations, plotted against the median sample age from the Bacon age-depth model. Vertical and horizontal lines are 95% error bars for the phenolic concentrations and sample ages, respectively.

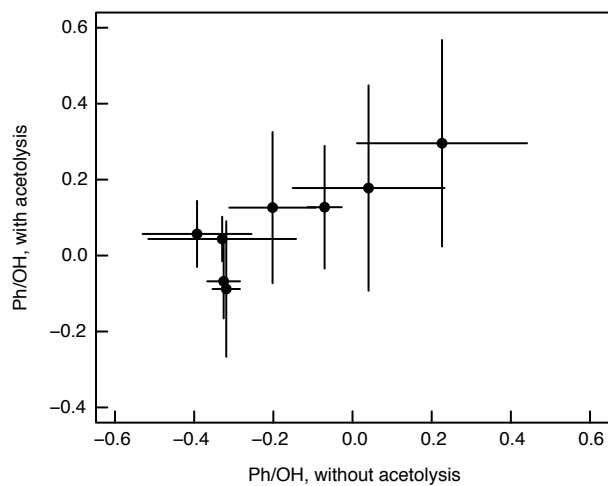

**Supplementary Figure S3. Comparison of phenolic concentrations in samples with and without acetolysis (oxidation) as part of the processing procedure.** Circles are the mean of three replicates, vertical lines are 1 standard deviation. For correlation among means,  $n = 8$ , Spearman's  $r = 0.87$ ,  $p = 0.005$ .
